# Supplementary material for: The interplay between chromosome stability and cell cycle control explored through gene–gene interaction and computational simulation
Source: PubMed Central journal article supplement — Nucleic Acids Res. 2016 Aug 16;44(17):8073–85. doi: 10.1093/nar/gkw715 (PMC5041493; doi:10.1093/nar/gkw715), 2016-08-16
Supplement: supp_gkw715_nar-00958-n-2016-File014.pdf [file supp_gkw715_nar-00958-n-2016-File014.pdf]

## Supplementary Table S1:

This file contains Synthetic Dosage Interaction data of Frumkin et al.

**Example:** The growth of various deletion mutant strains (and the parental strain *BY4741*) were transformed with MORF plasmids (and the empty vector *BG1766*) and subsequently plated using 1x, 10x, 100x, and 1000x dilutions. The top petri dish contains galactose & raffinose to induce gene expression from the MORF plasmid, while the bottom petri dish instead contains glucose to repress gene expression. A second controlled experiment to re-test the failed *pGAL-REC8-ch1Δ* combination is not shown in this example.

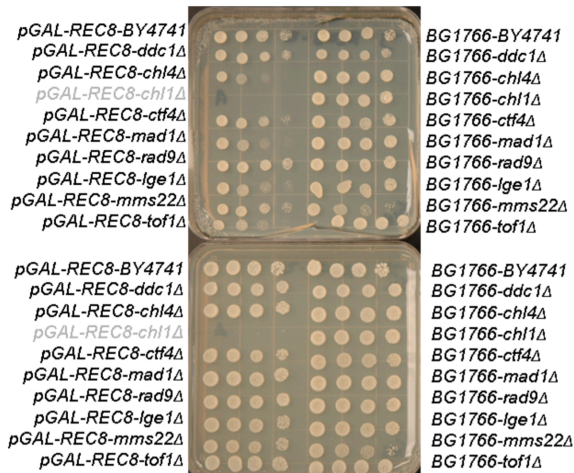

Note that a score of 4 means there is no synthetic dosage lethality; a score of 1 means there was a strong Synthetic Dosage Lethality interaction. 'S' means there was suppression of the growth retardation effect of the mutation by the MORF plasmid. BY4741 is the MORF vector.

| <b>KEY</b>                                                  |           | <b>Deletion mutation</b> | <b>MORF Plasmid</b> | <b>Growth</b> |
|-------------------------------------------------------------|-----------|--------------------------|---------------------|---------------|
| <b>Growth relative to that of strain containing BY4741:</b> |           | <i>chl4Δ</i>             | <i>Empty Vector</i> | 4             |
| <b>Suppression</b>                                          | <b>S</b>  | <i>chl4Δ</i>             | <i>pGAL-IME2</i>    | 1             |
| <b>Equal</b>                                                | <b>4</b>  | <i>chl4Δ</i>             | <i>pGAL-NDT80</i>   | 2             |
|                                                             | <b>3</b>  | <i>chl4Δ</i>             | <i>pGAL-REC8</i>    | 2             |
|                                                             | <b>2</b>  | <i>chl4Δ</i>             | <i>pGAL-CDC5</i>    | 3             |
| <b>Low</b>                                                  | <b>1</b>  | <i>chl4Δ</i>             | <i>pGAL-CSE4</i>    | 2             |
| <b>Data not available</b>                                   | <b>na</b> | <i>chl4Δ</i>             | <i>pGAL-YDR387C</i> | 4             |
|                                                             |           | <i>chl4Δ</i>             | <i>pGAL-XRS2</i>    | 4             |
|                                                             |           | <i>chl4Δ</i>             | <i>pGAL-MOT2</i>    | 4             |
|                                                             |           | <i>chl4Δ</i>             | <i>pGAL-HMLα2</i>   | 4             |
|                                                             |           | <i>chl4Δ</i>             | <i>pGAL-HHT2</i>    | 4             |
|                                                             |           | <i>chl4Δ</i>             | <i>pGAL-ELG1</i>    | 4             |
|                                                             |           | <i>chl4Δ</i>             | <i>pGAL-CLN1</i>    | 4             |
|                                                             |           | <i>chl4Δ</i>             | <i>pGAL-CDC4</i>    | 4             |
|                                                             |           | <i>chl4Δ</i>             | <i>pGAL-NRM1</i>    | 4             |
|                                                             |           | <i>chl4Δ</i>             | <i>pGAL-YGL182C</i> | 4             |
|                                                             |           | <i>chl4Δ</i>             | <i>pGAL-CLB5</i>    | S             |
|                                                             |           | <i>chl4Δ</i>             | <i>pGAL-MOT3</i>    | 4             |
|                                                             |           | <i>chl4Δ</i>             | <i>pGAL-YRB1</i>    | 4             |
|                                                             |           | <i>chl4Δ</i>             | <i>pGAL-CDC20</i>   | 4             |
|                                                             |           | <i>chl1Δ</i>             | <i>Empty Vector</i> | 4             |
|                                                             |           | <i>chl1Δ</i>             | <i>pGAL-IME2</i>    | 1             |
|                                                             |           | <i>chl1Δ</i>             | <i>pGAL-NDT80</i>   | 3             |
|                                                             |           | <i>chl1Δ</i>             | <i>pGAL-REC8</i>    | 3             |
|                                                             |           | <i>chl1Δ</i>             | <i>pGAL-CDC5</i>    | 4             |
|                                                             |           | <i>chl1Δ</i>             | <i>pGAL-CSE4</i>    | 4             |
|                                                             |           | <i>chl1Δ</i>             | <i>pGAL-YDR387C</i> | 2             |
|                                                             |           | <i>chl1Δ</i>             | <i>pGAL-XRS2</i>    | 4             |
|                                                             |           | <i>chl1Δ</i>             | <i>pGAL-MOT2</i>    | 4             |
|                                                             |           | <i>chl1Δ</i>             | <i>pGAL-HMLα2</i>   | 4             |
|                                                             |           | <i>chl1Δ</i>             | <i>pGAL-HHT2</i>    | 4             |
|                                                             |           | <i>chl1Δ</i>             | <i>pGAL-ELG1</i>    | 4             |
|                                                             |           | <i>chl1Δ</i>             | <i>pGAL-CLN1</i>    | 4             |
|                                                             |           | <i>chl1Δ</i>             | <i>pGAL-CDC4</i>    | 4             |
|                                                             |           | <i>chl1Δ</i>             | <i>pGAL-NRM1</i>    | 4             |
|                                                             |           | <i>chl1Δ</i>             | <i>pGAL-YGL182C</i> | 3             |
|                                                             |           | <i>chl1Δ</i>             | <i>pGAL-CLB5</i>    | 1             |

|              |                     |    |
|--------------|---------------------|----|
| <i>chl1Δ</i> | <i>pGAL-MOT3</i>    | 4  |
| <i>chl1Δ</i> | <i>pGAL-YRB1</i>    | 4  |
| <i>chl1Δ</i> | <i>pGAL-CDC20</i>   | 4  |
| <i>ctf4Δ</i> | <i>Empty Vector</i> | 4  |
| <i>ctf4Δ</i> | <i>pGAL-IME2</i>    | 1  |
| <i>ctf4Δ</i> | <i>pGAL-NDT80</i>   | 1  |
| <i>ctf4Δ</i> | <i>pGAL-REC8</i>    | 4  |
| <i>ctf4Δ</i> | <i>pGAL-CDC5</i>    | S  |
| <i>ctf4Δ</i> | <i>pGAL-CSE4</i>    | 4  |
| <i>ctf4Δ</i> | <i>pGAL-YDR387C</i> | na |
| <i>ctf4Δ</i> | <i>pGAL-XRS2</i>    | 4  |
| <i>ctf4Δ</i> | <i>pGAL-MOT2</i>    | 3  |
| <i>ctf4Δ</i> | <i>pGAL-HMLα2</i>   | 4  |
| <i>ctf4Δ</i> | <i>pGAL-HHT2</i>    | 4  |
| <i>ctf4Δ</i> | <i>pGAL-ELG1</i>    | 4  |
| <i>ctf4Δ</i> | <i>pGAL-CLN1</i>    | 4  |
| <i>ctf4Δ</i> | <i>pGAL-CDC4</i>    | 4  |
| <i>ctf4Δ</i> | <i>pGAL-NRM1</i>    | 4  |
| <i>ctf4Δ</i> | <i>pGAL-YGL182C</i> | 4  |
| <i>ctf4Δ</i> | <i>pGAL-CLB5</i>    | S  |
| <i>ctf4Δ</i> | <i>pGAL-MOT3</i>    | 4  |
| <i>ctf4Δ</i> | <i>pGAL-YRB1</i>    | S  |
| <i>ctf4Δ</i> | <i>pGAL-CDC20</i>   | S  |
| <i>ddc1Δ</i> | <i>Empty Vector</i> | 4  |
| <i>ddc1Δ</i> | <i>pGAL-IME2</i>    | 1  |
| <i>ddc1Δ</i> | <i>pGAL-NDT80</i>   | 2  |
| <i>ddc1Δ</i> | <i>pGAL-REC8</i>    | 4  |
| <i>ddc1Δ</i> | <i>pGAL-CDC5</i>    | 1  |
| <i>ddc1Δ</i> | <i>pGAL-CSE4</i>    | 4  |
| <i>ddc1Δ</i> | <i>pGAL-YDR387C</i> | 3  |
| <i>ddc1Δ</i> | <i>pGAL-XRS2</i>    | S  |
| <i>ddc1Δ</i> | <i>pGAL-MOT2</i>    | 4  |
| <i>ddc1Δ</i> | <i>pGAL-HMLα2</i>   | 4  |
| <i>ddc1Δ</i> | <i>pGAL-HHT2</i>    | 4  |
| <i>ddc1Δ</i> | <i>pGAL-ELG1</i>    | 2  |
| <i>ddc1Δ</i> | <i>pGAL-CLN1</i>    | 4  |
| <i>ddc1Δ</i> | <i>pGAL-CDC4</i>    | 4  |
| <i>ddc1Δ</i> | <i>pGAL-NRM1</i>    | 4  |
| <i>ddc1Δ</i> | <i>pGAL-YGL182C</i> | 4  |
| <i>ddc1Δ</i> | <i>pGAL-CLB5</i>    | 4  |
| <i>ddc1Δ</i> | <i>pGAL-MOT3</i>    | 4  |
| <i>ddc1Δ</i> | <i>pGAL-YRB1</i>    | 1  |
| <i>ddc1Δ</i> | <i>pGAL-CDC20</i>   | 4  |

|               |              |   |
|---------------|--------------|---|
| <i>iml3Δ</i>  | Empty Vector | 4 |
| <i>iml3Δ</i>  | pGAL-IME2    | 1 |
| <i>iml3Δ</i>  | pGAL-NDT80   | 2 |
| <i>iml3Δ</i>  | pGAL-REC8    | 2 |
| <i>iml3Δ</i>  | pGAL-CDC5    | 2 |
| <i>iml3Δ</i>  | pGAL-CSE4    | 4 |
| <i>iml3Δ</i>  | pGAL-YDR387C | 4 |
| <i>iml3Δ</i>  | pGAL-XRS2    | 1 |
| <i>iml3Δ</i>  | pGAL-MOT2    | 4 |
| <i>iml3Δ</i>  | pGAL-HMLα2   | 4 |
| <i>iml3Δ</i>  | pGAL-HHT2    | 4 |
| <i>iml3Δ</i>  | pGAL-ELG1    | 4 |
| <i>iml3Δ</i>  | pGAL-CLN1    | 4 |
| <i>iml3Δ</i>  | pGAL-CDC4    | 4 |
| <i>iml3Δ</i>  | pGAL-NRM1    | 4 |
| <i>iml3Δ</i>  | pGAL-YGL182C | 4 |
| <i>iml3Δ</i>  | pGAL-CLB5    | 1 |
| <i>iml3Δ</i>  | pGAL-MOT3    | 2 |
| <i>iml3Δ</i>  | pGAL-YRB1    | 4 |
| <i>iml3Δ</i>  | pGAL-CDC20   | 4 |
| <i>lge1Δ</i>  | Empty Vector | 4 |
| <i>lge1Δ</i>  | pGAL-IME2    | 1 |
| <i>lge1Δ</i>  | pGAL-NDT80   | 3 |
| <i>lge1Δ</i>  | pGAL-REC8    | 2 |
| <i>lge1Δ</i>  | pGAL-CDC5    | 3 |
| <i>lge1Δ</i>  | pGAL-CSE4    | 4 |
| <i>lge1Δ</i>  | pGAL-YDR387C | 2 |
| <i>lge1Δ</i>  | pGAL-XRS2    | 3 |
| <i>lge1Δ</i>  | pGAL-MOT2    | 4 |
| <i>lge1Δ</i>  | pGAL-HMLα2   | 4 |
| <i>lge1Δ</i>  | pGAL-HHT2    | 4 |
| <i>lge1Δ</i>  | pGAL-ELG1    | 4 |
| <i>lge1Δ</i>  | pGAL-CLN1    | 4 |
| <i>lge1Δ</i>  | pGAL-CDC4    | 4 |
| <i>lge1Δ</i>  | pGAL-NRM1    | 4 |
| <i>lge1Δ</i>  | pGAL-YGL182C | 4 |
| <i>lge1Δ</i>  | pGAL-CLB5    | 5 |
| <i>lge1Δ</i>  | pGAL-MOT3    | 5 |
| <i>lge1Δ</i>  | pGAL-YRB1    | 4 |
| <i>lge1Δ</i>  | pGAL-CDC20   | 5 |
| <i>mms22Δ</i> | Empty Vector | 4 |
| <i>mms22Δ</i> | pGAL-IME2    | 1 |
| <i>mms22Δ</i> | pGAL-NDT80   | 2 |

|               |                     |    |
|---------------|---------------------|----|
| <i>mms22Δ</i> | <i>pGAL-REC8</i>    | 3  |
| <i>mms22Δ</i> | <i>pGAL-CDC5</i>    | 2  |
| <i>mms22Δ</i> | <i>pGAL-CSE4</i>    | na |
| <i>mms22Δ</i> | <i>pGAL-YDR387C</i> | na |
| <i>mms22Δ</i> | <i>pGAL-XRS2</i>    | na |
| <i>mms22Δ</i> | <i>pGAL-MOT2</i>    | 4  |
| <i>mms22Δ</i> | <i>pGAL-HMLα2</i>   | 4  |
| <i>mms22Δ</i> | <i>pGAL-HHT2</i>    | 4  |
| <i>mms22Δ</i> | <i>pGAL-ELG1</i>    | 4  |
| <i>mms22Δ</i> | <i>pGAL-CLN1</i>    | 4  |
| <i>mms22Δ</i> | <i>pGAL-CDC4</i>    | 4  |
| <i>mms22Δ</i> | <i>pGAL-NRM1</i>    | 4  |
| <i>mms22Δ</i> | <i>pGAL-YGL182C</i> | na |
| <i>mms22Δ</i> | <i>pGAL-CLB5</i>    | 4  |
| <i>mms22Δ</i> | <i>pGAL-MOT3</i>    | 4  |
| <i>mms22Δ</i> | <i>pGAL-YRB1</i>    | 1  |
| <i>mms22Δ</i> | <i>pGAL-CDC20</i>   | S  |
| <i>mcm22Δ</i> | <i>Empty Vector</i> | 4  |
| <i>mcm22Δ</i> | <i>pGAL-IME2</i>    | 1  |
| <i>mcm22Δ</i> | <i>pGAL-NDT80</i>   | 2  |
| <i>mcm22Δ</i> | <i>pGAL-REC8</i>    | 2  |
| <i>mcm22Δ</i> | <i>pGAL-CDC5</i>    | 3  |
| <i>mcm22Δ</i> | <i>pGAL-CSE4</i>    | 2  |
| <i>mcm22Δ</i> | <i>pGAL-YDR387C</i> | 4  |
| <i>mcm22Δ</i> | <i>pGAL-XRS2</i>    | 4  |
| <i>mcm22Δ</i> | <i>pGAL-MOT2</i>    | 4  |
| <i>mcm22Δ</i> | <i>pGAL-HMLα2</i>   | 4  |
| <i>mcm22Δ</i> | <i>pGAL-HHT2</i>    | 4  |
| <i>mcm22Δ</i> | <i>pGAL-ELG1</i>    | 4  |
| <i>mcm22Δ</i> | <i>pGAL-CLN1</i>    | 4  |
| <i>mcm22Δ</i> | <i>pGAL-CDC4</i>    | 4  |
| <i>mcm22Δ</i> | <i>pGAL-NRM1</i>    | 4  |
| <i>mcm22Δ</i> | <i>pGAL-YGL182C</i> | 4  |
| <i>mcm22Δ</i> | <i>pGAL-CLB5</i>    | 4  |
| <i>mcm22Δ</i> | <i>pGAL-MOT3</i>    | 4  |
| <i>mcm22Δ</i> | <i>pGAL-YRB1</i>    | S  |
| <i>mcm22Δ</i> | <i>pGAL-CDC20</i>   | 4  |
| <i>mcm21Δ</i> | <i>Empty Vector</i> | 4  |
| <i>mcm21Δ</i> | <i>pGAL-IME2</i>    | 1  |
| <i>mcm21Δ</i> | <i>pGAL-NDT80</i>   | 2  |
| <i>mcm21Δ</i> | <i>pGAL-REC8</i>    | na |
| <i>mcm21Δ</i> | <i>pGAL-CDC5</i>    | 3  |
| <i>mcm21Δ</i> | <i>pGAL-CSE4</i>    | 3  |

|               |                     |    |
|---------------|---------------------|----|
| <i>mcm21Δ</i> | <i>pGAL-YDR387C</i> | 4  |
| <i>mcm21Δ</i> | <i>pGAL-XRS2</i>    | 4  |
| <i>mcm21Δ</i> | <i>pGAL-MOT2</i>    | 4  |
| <i>mcm21Δ</i> | <i>pGAL-HMLα2</i>   | 4  |
| <i>mcm21Δ</i> | <i>pGAL-HHT2</i>    | 4  |
| <i>mcm21Δ</i> | <i>pGAL-ELG1</i>    | 4  |
| <i>mcm21Δ</i> | <i>pGAL-CLN1</i>    | 4  |
| <i>mcm21Δ</i> | <i>pGAL-CDC4</i>    | 4  |
| <i>mcm21Δ</i> | <i>pGAL-NRM1</i>    | 4  |
| <i>mcm21Δ</i> | <i>pGAL-YGL182C</i> | 4  |
| <i>mcm21Δ</i> | <i>pGAL-CLB5</i>    | 4  |
| <i>mcm21Δ</i> | <i>pGAL-MOT3</i>    | S  |
| <i>mcm21Δ</i> | <i>pGAL-YRB1</i>    | 4  |
| <i>mcm21Δ</i> | <i>pGAL-CDC20</i>   | S  |
| <i>mec3Δ</i>  | <i>Empty Vector</i> | 4  |
| <i>mec3Δ</i>  | <i>pGAL-IME2</i>    | 1  |
| <i>mec3Δ</i>  | <i>pGAL-NDT80</i>   | 3  |
| <i>mec3Δ</i>  | <i>pGAL-REC8</i>    | 1  |
| <i>mec3Δ</i>  | <i>pGAL-CDC5</i>    | 4  |
| <i>mec3Δ</i>  | <i>pGAL-CSE4</i>    | 4  |
| <i>mec3Δ</i>  | <i>pGAL-YDR387C</i> | 4  |
| <i>mec3Δ</i>  | <i>pGAL-XRS2</i>    | 3  |
| <i>mec3Δ</i>  | <i>pGAL-MOT2</i>    | na |
| <i>mec3Δ</i>  | <i>pGAL-HMLα2</i>   | 4  |
| <i>mec3Δ</i>  | <i>pGAL-HHT2</i>    | 4  |
| <i>mec3Δ</i>  | <i>pGAL-ELG1</i>    | 4  |
| <i>mec3Δ</i>  | <i>pGAL-CLN1</i>    | 4  |
| <i>mec3Δ</i>  | <i>pGAL-CDC4</i>    | 4  |
| <i>mec3Δ</i>  | <i>pGAL-NRM1</i>    | 4  |
| <i>mec3Δ</i>  | <i>pGAL-YGL182C</i> | 4  |
| <i>mec3Δ</i>  | <i>pGAL-CLB5</i>    | 2  |
| <i>mec3Δ</i>  | <i>pGAL-MOT3</i>    | 1  |
| <i>mec3Δ</i>  | <i>pGAL-YRB1</i>    | 4  |
| <i>mec3Δ</i>  | <i>pGAL-CDC20</i>   | S  |
| <i>mad1Δ</i>  | <i>Empty Vector</i> | 4  |
| <i>mad1Δ</i>  | <i>pGAL-IME2</i>    | 1  |
| <i>mad1Δ</i>  | <i>pGAL-NDT80</i>   | 3  |
| <i>mad1Δ</i>  | <i>pGAL-REC8</i>    | 2  |
| <i>mad1Δ</i>  | <i>pGAL-CDC5</i>    | 4  |
| <i>mad1Δ</i>  | <i>pGAL-CSE4</i>    | 2  |
| <i>mad1Δ</i>  | <i>pGAL-YDR387C</i> | 4  |
| <i>mad1Δ</i>  | <i>pGAL-XRS2</i>    | 4  |
| <i>mad1Δ</i>  | <i>pGAL-MOT2</i>    | 4  |

|                 |                     |   |
|-----------------|---------------------|---|
| <i>mad1Δ</i>    | <i>pGAL-HMLα2</i>   | 4 |
| <i>mad1Δ</i>    | <i>pGAL-HHT2</i>    | 4 |
| <i>mad1Δ</i>    | <i>pGAL-ELG1</i>    | 4 |
| <i>mad1Δ</i>    | <i>pGAL-CLN1</i>    | 4 |
| <i>mad1Δ</i>    | <i>pGAL-CDC4</i>    | 4 |
| <i>mad1Δ</i>    | <i>pGAL-NRM1</i>    | 4 |
| <i>mad1Δ</i>    | <i>pGAL-YGL182C</i> | 4 |
| <i>mad1Δ</i>    | <i>pGAL-CLB5</i>    | 5 |
| <i>mad1Δ</i>    | <i>pGAL-MOT3</i>    | 5 |
| <i>mad1Δ</i>    | <i>pGAL-YRB1</i>    | 4 |
| <i>mad1Δ</i>    | <i>pGAL-CDC20</i>   | 5 |
| <i>mad2Δ</i>    | <i>Empty Vector</i> | 4 |
| <i>mad2Δ</i>    | <i>pGAL-IME2</i>    | 1 |
| <i>mad2Δ</i>    | <i>pGAL-NDT80</i>   | 2 |
| <i>mad2Δ</i>    | <i>pGAL-REC8</i>    | 2 |
| <i>mad2Δ</i>    | <i>pGAL-CDC5</i>    | 3 |
| <i>mad2Δ</i>    | <i>pGAL-CSE4</i>    | 3 |
| <i>mad2Δ</i>    | <i>pGAL-YDR387C</i> | 3 |
| <i>mad2Δ</i>    | <i>pGAL-XRS2</i>    | 4 |
| <i>mad2Δ</i>    | <i>pGAL-MOT2</i>    | 4 |
| <i>mad2Δ</i>    | <i>pGAL-HMLα2</i>   | 4 |
| <i>mad2Δ</i>    | <i>pGAL-HHT2</i>    | 4 |
| <i>mad2Δ</i>    | <i>pGAL-ELG1</i>    | 4 |
| <i>mad2Δ</i>    | <i>pGAL-CLN1</i>    | 4 |
| <i>mad2Δ</i>    | <i>pGAL-CDC4</i>    | 4 |
| <i>mad2Δ</i>    | <i>pGAL-NRM1</i>    | 1 |
| <i>mad2Δ</i>    | <i>pGAL-YGL182C</i> | 2 |
| <i>mad2Δ</i>    | <i>pGAL-CLB5</i>    | 1 |
| <i>mad2Δ</i>    | <i>pGAL-MOT3</i>    | 4 |
| <i>mad2Δ</i>    | <i>pGAL-YRB1</i>    | 3 |
| <i>mad2Δ</i>    | <i>pGAL-CDC20</i>   | 4 |
| <i>y1r235cΔ</i> | <i>Empty Vector</i> | 4 |
| <i>y1r235cΔ</i> | <i>pGAL-IME2</i>    | 1 |
| <i>y1r235cΔ</i> | <i>pGAL-NDT80</i>   | 2 |
| <i>y1r235cΔ</i> | <i>pGAL-REC8</i>    | 3 |
| <i>y1r235cΔ</i> | <i>pGAL-CDC5</i>    | 3 |
| <i>y1r235cΔ</i> | <i>pGAL-CSE4</i>    | 3 |
| <i>y1r235cΔ</i> | <i>pGAL-YDR387C</i> | 1 |
| <i>y1r235cΔ</i> | <i>pGAL-XRS2</i>    | 3 |
| <i>y1r235cΔ</i> | <i>pGAL-MOT2</i>    | 3 |
| <i>y1r235cΔ</i> | <i>pGAL-HMLα2</i>   | 4 |
| <i>y1r235cΔ</i> | <i>pGAL-HHT2</i>    | 4 |
| <i>y1r235cΔ</i> | <i>pGAL-ELG1</i>    | 4 |

|                 |                     |    |
|-----------------|---------------------|----|
| <i>ylr235cΔ</i> | <i>pGAL-CLN1</i>    | 4  |
| <i>ylr235cΔ</i> | <i>pGAL-CDC4</i>    | 4  |
| <i>ylr235cΔ</i> | <i>pGAL-NRM1</i>    | 4  |
| <i>ylr235cΔ</i> | <i>pGAL-YGL182C</i> | 4  |
| <i>ylr235cΔ</i> | <i>pGAL-CLB5</i>    | 4  |
| <i>ylr235cΔ</i> | <i>pGAL-MOT3</i>    | 1  |
| <i>ylr235cΔ</i> | <i>pGAL-YRB1</i>    | 4  |
| <i>ylr235cΔ</i> | <i>pGAL-CDC20</i>   | 5  |
| <i>rad9Δ</i>    | Empty Vector        | 4  |
| <i>rad9Δ</i>    | <i>pGAL-IME2</i>    | 1  |
| <i>rad9Δ</i>    | <i>pGAL-NDT80</i>   | 3  |
| <i>rad9Δ</i>    | <i>pGAL-REC8</i>    | 4  |
| <i>rad9Δ</i>    | <i>pGAL-CDC5</i>    | 3  |
| <i>rad9Δ</i>    | <i>pGAL-CSE4</i>    | 4  |
| <i>rad9Δ</i>    | <i>pGAL-YDR387C</i> | na |
| <i>rad9Δ</i>    | <i>pGAL-XRS2</i>    | 4  |
| <i>rad9Δ</i>    | <i>pGAL-MOT2</i>    | 4  |
| <i>rad9Δ</i>    | <i>pGAL-HMLα2</i>   | 4  |
| <i>rad9Δ</i>    | <i>pGAL-HHT2</i>    | 4  |
| <i>rad9Δ</i>    | <i>pGAL-ELG1</i>    | 4  |
| <i>rad9Δ</i>    | <i>pGAL-CLN1</i>    | 4  |
| <i>rad9Δ</i>    | <i>pGAL-CDC4</i>    | 4  |
| <i>rad9Δ</i>    | <i>pGAL-NRM1</i>    | 4  |
| <i>rad9Δ</i>    | <i>pGAL-YGL182C</i> | 4  |
| <i>rad9Δ</i>    | <i>pGAL-CLB5</i>    | 4  |
| <i>rad9Δ</i>    | <i>pGAL-MOT3</i>    | 4  |
| <i>rad9Δ</i>    | <i>pGAL-YRB1</i>    | 4  |
| <i>rad9Δ</i>    | <i>pGAL-CDC20</i>   | 5  |
| <i>rad54Δ</i>   | Empty Vector        | 4  |
| <i>rad54Δ</i>   | <i>pGAL-IME2</i>    | 1  |
| <i>rad54Δ</i>   | <i>pGAL-NDT80</i>   | 2  |
| <i>rad54Δ</i>   | <i>pGAL-REC8</i>    | 2  |
| <i>rad54Δ</i>   | <i>pGAL-CDC5</i>    | 3  |
| <i>rad54Δ</i>   | <i>pGAL-CSE4</i>    | 4  |
| <i>rad54Δ</i>   | <i>pGAL-YDR387C</i> | 4  |
| <i>rad54Δ</i>   | <i>pGAL-XRS2</i>    | 4  |
| <i>rad54Δ</i>   | <i>pGAL-MOT2</i>    | 4  |
| <i>rad54Δ</i>   | <i>pGAL-HMLα2</i>   | 4  |
| <i>rad54Δ</i>   | <i>pGAL-HHT2</i>    | 4  |
| <i>rad54Δ</i>   | <i>pGAL-ELG1</i>    | 4  |
| <i>rad54Δ</i>   | <i>pGAL-CLN1</i>    | 4  |
| <i>rad54Δ</i>   | <i>pGAL-CDC4</i>    | 4  |
| <i>rad54Δ</i>   | <i>pGAL-NRM1</i>    | na |



|                |                     |    |
|----------------|---------------------|----|
| <i>rad54</i> Δ | <i>pGAL-YGL182C</i> | 4  |
| <i>rad54</i> Δ | <i>pGAL-CLB5</i>    | 4  |
| <i>rad54</i> Δ | <i>pGAL-MOT3</i>    | S  |
| <i>rad54</i> Δ | <i>pGAL-YRB1</i>    | 1  |
| <i>rad54</i> Δ | <i>pGAL-CDC20</i>   | S  |
| <i>rad61</i> Δ | <i>Empty Vector</i> | 4  |
| <i>rad61</i> Δ | <i>pGAL-IME2</i>    | 1  |
| <i>rad61</i> Δ | <i>pGAL-NDT80</i>   | 2  |
| <i>rad61</i> Δ | <i>pGAL-REC8</i>    | 2  |
| <i>rad61</i> Δ | <i>pGAL-CDC5</i>    | 3  |
| <i>rad61</i> Δ | <i>pGAL-CSE4</i>    | 4  |
| <i>rad61</i> Δ | <i>pGAL-YDR387C</i> | 4  |
| <i>rad61</i> Δ | <i>pGAL-XRS2</i>    | 4  |
| <i>rad61</i> Δ | <i>pGAL-MOT2</i>    | 4  |
| <i>rad61</i> Δ | <i>pGAL-HMLα2</i>   | 4  |
| <i>rad61</i> Δ | <i>pGAL-HHT2</i>    | 4  |
| <i>rad61</i> Δ | <i>pGAL-ELG1</i>    | 4  |
| <i>rad61</i> Δ | <i>pGAL-CLN1</i>    | 4  |
| <i>rad61</i> Δ | <i>pGAL-CDC4</i>    | 4  |
| <i>rad61</i> Δ | <i>pGAL-NRM1</i>    | 1  |
| <i>rad61</i> Δ | <i>pGAL-YGL182C</i> | 4  |
| <i>rad61</i> Δ | <i>pGAL-CLB5</i>    | 4  |
| <i>rad61</i> Δ | <i>pGAL-MOT3</i>    | 3  |
| <i>rad61</i> Δ | <i>pGAL-YRB1</i>    | S  |
| <i>rad61</i> Δ | <i>pGAL-CDC20</i>   | S  |
| <i>spt21</i> Δ | <i>Empty Vector</i> | 4  |
| <i>spt21</i> Δ | <i>pGAL-IME2</i>    | 1  |
| <i>spt21</i> Δ | <i>pGAL-NDT80</i>   | 4  |
| <i>spt21</i> Δ | <i>pGAL-REC8</i>    | 3  |
| <i>spt21</i> Δ | <i>pGAL-CDC5</i>    | 2  |
| <i>spt21</i> Δ | <i>pGAL-CSE4</i>    | 4  |
| <i>spt21</i> Δ | <i>pGAL-YDR387C</i> | 4  |
| <i>spt21</i> Δ | <i>pGAL-XRS2</i>    | S  |
| <i>spt21</i> Δ | <i>pGAL-MOT2</i>    | 4  |
| <i>spt21</i> Δ | <i>pGAL-HMLα2</i>   | 4  |
| <i>spt21</i> Δ | <i>pGAL-HHT2</i>    | 4  |
| <i>spt21</i> Δ | <i>pGAL-ELG1</i>    | 4  |
| <i>spt21</i> Δ | <i>pGAL-CLN1</i>    | 4  |
| <i>spt21</i> Δ | <i>pGAL-CDC4</i>    | 4  |
| <i>spt21</i> Δ | <i>pGAL-NRM1</i>    | na |
| <i>spt21</i> Δ | <i>pGAL-YGL182C</i> | 1  |
| <i>spt21</i> Δ | <i>pGAL-CLB5</i>    | 2  |
| <i>spt21</i> Δ | <i>pGAL-MOT3</i>    | na |

|               |                     |   |
|---------------|---------------------|---|
| <i>spt21Δ</i> | <i>pGAL-YRB1</i>    | 1 |
| <i>spt21Δ</i> | <i>pGAL-CDC20</i>   | 5 |
| <i>tof1Δ</i>  | <i>Empty Vector</i> | 4 |
| <i>tof1Δ</i>  | <i>pGAL-IME2</i>    | 1 |
| <i>tof1Δ</i>  | <i>pGAL-NDT80</i>   | 2 |
| <i>tof1Δ</i>  | <i>pGAL-REC8</i>    | 2 |
| <i>tof1Δ</i>  | <i>pGAL-CDC5</i>    | 4 |
| <i>tof1Δ</i>  | <i>pGAL-CSE4</i>    | 4 |
| <i>tof1Δ</i>  | <i>pGAL-YDR387C</i> | 4 |
| <i>tof1Δ</i>  | <i>pGAL-XRS2</i>    | 4 |
| <i>tof1Δ</i>  | <i>pGAL-MOT2</i>    | 4 |
| <i>tof1Δ</i>  | <i>pGAL-HMLα2</i>   | 4 |
| <i>tof1Δ</i>  | <i>pGAL-HHT2</i>    | 4 |
| <i>tof1Δ</i>  | <i>pGAL-ELG1</i>    | 4 |
| <i>tof1Δ</i>  | <i>pGAL-CLN1</i>    | 4 |
| <i>tof1Δ</i>  | <i>pGAL-CDC4</i>    | 4 |
| <i>tof1Δ</i>  | <i>pGAL-NRM1</i>    | 4 |
| <i>tof1Δ</i>  | <i>pGAL-YGL182C</i> | 4 |
| <i>tof1Δ</i>  | <i>pGAL-CLB5</i>    | 4 |
| <i>tof1Δ</i>  | <i>pGAL-MOT3</i>    | 4 |
| <i>tof1Δ</i>  | <i>pGAL-YRB1</i>    | 4 |
| <i>tof1Δ</i>  | <i>pGAL-CDC20</i>   | 5 |

## Supplementary Table S2:

| <b>Standard Name</b> | <b>Systematic Name</b> | <b>Reason For Selection</b>                    |
|----------------------|------------------------|------------------------------------------------|
| AAD6                 | YFL056C                | Studied as Possible Suppressor in Patra et al. |
| ABM1                 | YJR108W                | Studied as Possible Suppressor in Patra et al. |
| ADE2                 | YOR128C                | Studied as Possible Suppressor in Patra et al. |
| AGE1                 | YDR524C                | Studied as Possible Suppressor in Patra et al. |
| ANC1                 | YPL129W                | Studied as Possible Suppressor in Patra et al. |
| APG14                | YBR128C                | Studied as Possible Suppressor in Patra et al. |
| APG5                 | YPL149W                | Studied as Possible Suppressor in Patra et al. |
| ARE1                 | YCR048W                | Studied as Possible Suppressor in Patra et al. |
| ARP9                 | YMR033W                | Studied as Possible Suppressor in Patra et al. |
| ASK1                 | YKL052C                | Studied as Possible Suppressor in Patra et al. |
| AVO2                 | YMR068W                | Studied as Possible Suppressor in Patra et al. |
| BAT2                 | YJR148W                | Studied as Possible Suppressor in Patra et al. |
| BFR1                 | YOR198C                | Studied as Possible Suppressor in Patra et al. |
| BMH1                 | YER177W                | Studied as Possible Suppressor in Patra et al. |
| BMH2                 | YDR099W                | Studied as Possible Suppressor in Patra et al. |
| BRR6                 | YGL247W                | Studied as Possible Suppressor in Patra et al. |
| BUD28                | YLR062C                | Studied as Possible Suppressor in Patra et al. |
| BUD31                | YCR063W                | Studied as Possible Suppressor in Patra et al. |
| CCC2                 | YDR270W                | Studied as Possible Suppressor in Patra et al. |
| CCL1                 | YPR025C                | Studied as Possible Suppressor in Patra et al. |
| CDC20                | YGL116W                | Studied as Possible Suppressor in Patra et al. |
| CDC21                | YOR074C                | Studied as Possible Suppressor in Patra et al. |
| CDC37                | YDR168W                | Studied as Possible Suppressor in Patra et al. |
| CDC45                | YLR103C                | Studied as Possible Suppressor in Patra et al. |
| CDD1                 | YLR245C                | Studied as Possible Suppressor in Patra et al. |
| CDH1                 | YGL003C                | Studied as Possible Suppressor in Patra et al. |
| CKA2                 | YOR061W                | Studied as Possible Suppressor in Patra et al. |
| CLN1                 | YMR199W                | Studied as Possible Suppressor in Patra et al. |
| CSE1                 | YGL238W                | Studied as Possible Suppressor in Patra et al. |
| CSE2                 | YNR010W                | Studied as Possible Suppressor in Patra et al. |
| CST9                 | YLR394W                | Studied as Possible Suppressor in Patra et al. |
| CTF19                | YPL018W                | Studied as Possible Suppressor in Patra et al. |
| CTR3                 | YLR411W                | Studied as Possible Suppressor in Patra et al. |
| CWC24                | YLR323C                | Studied as Possible Suppressor in Patra et al. |
| CYC1                 | YJR048W                | Studied as Possible Suppressor in Patra et al. |
| DBF4                 | YDR052C                | Studied as Possible Suppressor in Patra et al. |
| DBP9                 | YLR276C                | Studied as Possible Suppressor in Patra et al. |
| DCG1                 | YIR030C                | Studied as Possible Suppressor in Patra et al. |
| DMC1                 | YER179W                | Miosis-Specific GO Terms                       |
| DON1                 | YDR273W                | Miosis-Specific GO Terms                       |
| ECM34                | YHL043W                | Studied as Possible Suppressor in Patra et al. |
| EDC1                 | YGL222C                | Studied as Possible Suppressor in Patra et al. |

|       |         |                                                |
|-------|---------|------------------------------------------------|
| ELA1  | YNL230C | Studied as Possible Suppressor in Patra et al. |
| ERG2  | YMR202W | Studied as Possible Suppressor in Patra et al. |
| EST1  | YLR233C | Studied as Possible Suppressor in Patra et al. |
| FAD1  | YDL045C | Studied as Possible Suppressor in Patra et al. |
| FCY1  | YPR062W | Studied as Possible Suppressor in Patra et al. |
| FIS1  | YIL065C | Studied as Possible Suppressor in Patra et al. |
| FIT3  | YOR383C | Studied as Possible Suppressor in Patra et al. |
| GAL80 | YML051W | Studied as Possible Suppressor in Patra et al. |
| GDS1  | YOR355W | Studied as Possible Suppressor in Patra et al. |
| GIP1  | YBR045C | Miosis-Specific GO Terms                       |
| GIS3  | YLR094C | Studied as Possible Suppressor in Patra et al. |
| GPD2  | YOL059W | Studied as Possible Suppressor in Patra et al. |
| GTR2  | YGR163W | Studied as Possible Suppressor in Patra et al. |
| HFM1  | YGL251C | Miosis-Specific GO Terms                       |
| HOP1  | YIL072W | Miosis-Specific GO Terms                       |
| HOP2  | YGL033W | Miosis-Specific GO Terms                       |
| HPA2  | YPR193C | Studied as Possible Suppressor in Patra et al. |
| HSH49 | YOR319W | Studied as Possible Suppressor in Patra et al. |
| HTA2  | YBL003C | Studied as Possible Suppressor in Patra et al. |
| HTB1  | YDR224C | Studied as Possible Suppressor in Patra et al. |
| IRC7  | YFR055W | Studied as Possible Suppressor in Patra et al. |
| ISC1  | YER019W | Studied as Possible Suppressor in Patra et al. |
| ISY1  | YJR050W | Studied as Possible Suppressor in Patra et al. |
| JEM1  | YJL073W | Studied as Possible Suppressor in Patra et al. |
| KEL3  | YPL263C | Studied as Possible Suppressor in Patra et al. |
| KIN28 | YDL108W | Studied as Possible Suppressor in Patra et al. |
| KRE34 | YLR317W | Studied as Possible Suppressor in Patra et al. |
| LAG2  | YOL025W | Studied as Possible Suppressor in Patra et al. |
| LCB2  | YDR062W | Studied as Possible Suppressor in Patra et al. |
| LOT6  | YLR011W | Studied as Possible Suppressor in Patra et al. |
| MBR1  | YKL093W | Studied as Possible Suppressor in Patra et al. |
| MCK1  | YNL307C | Studied as Possible Suppressor in Patra et al. |
| MCK1  | YNL307C | Miosis-Specific GO Terms                       |
| MED1  | YPR070W | Studied as Possible Suppressor in Patra et al. |
| MEI5  | YPL121C | Miosis-Specific GO Terms                       |
| MEK1  | YOR351C | Studied as Possible Suppressor in Patra et al. |
| MEK1  | YOR351C | Miosis-Specific GO Terms                       |
| MER1  | YNL210W | Miosis-Specific GO Terms                       |
| MET17 | YLR303W | Studied as Possible Suppressor in Patra et al. |
| MGT1  | YDL200C | Studied as Possible Suppressor in Patra et al. |
| MHT1  | YLL062C | Studied as Possible Suppressor in Patra et al. |
| MND1  | YGL183C | Studied as Possible Suppressor in Patra et al. |
| MOD5  | YOR274W | Studied as Possible Suppressor in Patra et al. |
| MPD1  | YOR288C | Studied as Possible Suppressor in Patra et al. |
| MTH1  | YDR277C | Studied as Possible Suppressor in Patra et al. |

|        |           |                                                |
|--------|-----------|------------------------------------------------|
| MTQ2   | YDR140W   | Studied as Possible Suppressor in Patra et al. |
| MUD1   | YBR119W   | Studied as Possible Suppressor in Patra et al. |
| MVP1   | YMR004W   | Studied as Possible Suppressor in Patra et al. |
| NBP2   | YDR162C   | Studied as Possible Suppressor in Patra et al. |
| NDJ1   | YOL104C   | Miosis-Specific GO Terms                       |
| NDT80  | YHR124W   | Miosis-Specific GO Terms                       |
| NRG1   | YDR043C   | Studied as Possible Suppressor in Patra et al. |
| OCA5   | YHL029C   | Studied as Possible Suppressor in Patra et al. |
| OLE1   | YGL055W   | Studied as Possible Suppressor in Patra et al. |
| PAN6   | YIL145C   | Studied as Possible Suppressor in Patra et al. |
| PCL9   | YDL179W   | Studied as Possible Suppressor in Patra et al. |
| PGD1   | YGL025C   | Studied as Possible Suppressor in Patra et al. |
| PIB1   | YDR313C   | Studied as Possible Suppressor in Patra et al. |
| PMT1   | YDL095W   | Studied as Possible Suppressor in Patra et al. |
| PRB1   | YEL060C   | Studied as Possible Suppressor in Patra et al. |
| PRP16  | YKR086W   | Studied as Possible Suppressor in Patra et al. |
| PRP38  | YGR075C   | Studied as Possible Suppressor in Patra et al. |
| PRY1   | YJL079C   | Studied as Possible Suppressor in Patra et al. |
| REC8   | YPR007C   | Miosis-Specific GO Terms                       |
| REX4   | YOL080C   | Studied as Possible Suppressor in Patra et al. |
| RNP1   | YLL046C   | Studied as Possible Suppressor in Patra et al. |
| RPL15A | YLR029C   | Studied as Possible Suppressor in Patra et al. |
| RPL16A | YIL133C   | Studied as Possible Suppressor in Patra et al. |
| RPL16B | YNL069C   | Studied as Possible Suppressor in Patra et al. |
| RPL17B | YJL177W   | Studied as Possible Suppressor in Patra et al. |
| RPL23A | YBL087C   | Studied as Possible Suppressor in Patra et al. |
| RPL25  | YOL127W   | Studied as Possible Suppressor in Patra et al. |
| RPL26A | YLR344W   | Studied as Possible Suppressor in Patra et al. |
| RPL27A | YHR010W   | Studied as Possible Suppressor in Patra et al. |
| RPL27B | YDR471W   | Studied as Possible Suppressor in Patra et al. |
| RPL28  | YGL103W   | Studied as Possible Suppressor in Patra et al. |
| RPL34A | YER056C-A | Studied as Possible Suppressor in Patra et al. |
| RPL34B | YIL052C   | Studied as Possible Suppressor in Patra et al. |
| RPL37B | YDR500C   | Studied as Possible Suppressor in Patra et al. |
| RPL7A  | YGL076C   | Studied as Possible Suppressor in Patra et al. |
| RPL8A  | YHL033C   | Studied as Possible Suppressor in Patra et al. |
| RPS11A | YDR025W   | Studied as Possible Suppressor in Patra et al. |
| RPS16A | YMR143W   | Studied as Possible Suppressor in Patra et al. |
| RPS16B | YDL083C   | Studied as Possible Suppressor in Patra et al. |
| RPS18A | YDR450W   | Studied as Possible Suppressor in Patra et al. |
| RPS18B | YML026C   | Studied as Possible Suppressor in Patra et al. |
| RPS1A  | YLR441C   | Studied as Possible Suppressor in Patra et al. |
| RPS23A | YGR118W   | Studied as Possible Suppressor in Patra et al. |
| RPS25B | YLR333C   | Studied as Possible Suppressor in Patra et al. |
| RPS26B | YER131W   | Studied as Possible Suppressor in Patra et al. |

|        |           |                                                |
|--------|-----------|------------------------------------------------|
| RPT4   | YOR259C   | Studied as Possible Suppressor in Patra et al. |
| RRN5   | YLR141W   | Studied as Possible Suppressor in Patra et al. |
| RSM26  | YJR101W   | Studied as Possible Suppressor in Patra et al. |
| RTF1   | YGL244W   | Studied as Possible Suppressor in Patra et al. |
| SAD1   | YFR005C   | Studied as Possible Suppressor in Patra et al. |
| SAE3   | YHR079C-A | Miosis-Specific GO Terms                       |
| SAM1   | YLR180W   | Studied as Possible Suppressor in Patra et al. |
| SAS4   | YDR181C   | Studied as Possible Suppressor in Patra et al. |
| SCC4   | YER147C   | Studied as Possible Suppressor in Patra et al. |
| SCH9   | YHR205W   | Studied as Possible Suppressor in Patra et al. |
| SCT1   | YBL011W   | Studied as Possible Suppressor in Patra et al. |
| SDS24  | YBR214W   | Studied as Possible Suppressor in Patra et al. |
| SEC53  | YFL045C   | Studied as Possible Suppressor in Patra et al. |
| SEC61  | YLR378C   | Studied as Possible Suppressor in Patra et al. |
| SEN15  | YMR059W   | Studied as Possible Suppressor in Patra et al. |
| SEN54  | YPL083C   | Studied as Possible Suppressor in Patra et al. |
| SET3   | YKR029C   | Miosis-Specific GO Terms                       |
| SGN1   | YIR001C   | Studied as Possible Suppressor in Patra et al. |
| SKP1   | YDR328C   | Studied as Possible Suppressor in Patra et al. |
| SNU56  | YDR240C   | Studied as Possible Suppressor in Patra et al. |
| SNU66  | YOR308C   | Studied as Possible Suppressor in Patra et al. |
| SOL1   | YNR034W   | Studied as Possible Suppressor in Patra et al. |
| SPC25  | YER018C   | Studied as Possible Suppressor in Patra et al. |
| SPO1   | YNL012W   | Miosis-Specific GO Terms                       |
| SPO11  | YHL022C   | Miosis-Specific GO Terms                       |
| SPO13  | YHR014W   | Miosis-Specific GO Terms                       |
| SPO19  | YPL130W   | Miosis-Specific GO Terms                       |
| SPO20  | YMR017W   | Miosis-Specific GO Terms                       |
| SPO22  | YIL073C   | Miosis-Specific GO Terms                       |
| SPO7   | YAL009W   | Studied as Possible Suppressor in Patra et al. |
| SPO73  | YER046W   | Miosis-Specific GO Terms                       |
| SPO74  | YGL170C   | Studied as Possible Suppressor in Patra et al. |
| SPO75  | YLL005C   | Miosis-Specific GO Terms                       |
| SPO77  | YLR341W   | Miosis-Specific GO Terms                       |
| SPP2   | YOR148C   | Studied as Possible Suppressor in Patra et al. |
| SPS100 | YHR139C   | Studied as Possible Suppressor in Patra et al. |
| SPS19  | YNL202W   | Studied as Possible Suppressor in Patra et al. |
| SRB2   | YHR041C   | Studied as Possible Suppressor in Patra et al. |
| SRB5   | YGR104C   | Studied as Possible Suppressor in Patra et al. |
| SRP21  | YKL122C   | Studied as Possible Suppressor in Patra et al. |
| SSE1   | YPL106C   | Studied as Possible Suppressor in Patra et al. |
| SSN3   | YPL042C   | Studied as Possible Suppressor in Patra et al. |
| STE18  | YJR086W   | Studied as Possible Suppressor in Patra et al. |
| STE5   | YDR103W   | Studied as Possible Suppressor in Patra et al. |
| STN1   | YDR082W   | Studied as Possible Suppressor in Patra et al. |

|         |         |                                                |
|---------|---------|------------------------------------------------|
| SUA7    | YPR086W | Studied as Possible Suppressor in Patra et al. |
| SUI3    | YPL237W | Studied as Possible Suppressor in Patra et al. |
| SUT1    | YGL162W | Studied as Possible Suppressor in Patra et al. |
| SYS1    | YJL004C | Studied as Possible Suppressor in Patra et al. |
| TES1    | YJR019C | Studied as Possible Suppressor in Patra et al. |
| TFB3    | YDR460W | Studied as Possible Suppressor in Patra et al. |
| TIF1    | YKR059W | Studied as Possible Suppressor in Patra et al. |
| TIR2    | YOR010C | Studied as Possible Suppressor in Patra et al. |
| TKL1    | YPR074C | Studied as Possible Suppressor in Patra et al. |
| TPK2    | YPL203W | Studied as Possible Suppressor in Patra et al. |
| TRP1    | YDR007W | Studied as Possible Suppressor in Patra et al. |
| UFD1    | YGR048W | Studied as Possible Suppressor in Patra et al. |
| UME1    | YPL139C | Studied as Possible Suppressor in Patra et al. |
| URE2    | YNL229C | Studied as Possible Suppressor in Patra et al. |
| VMA4    | YOR332W | Studied as Possible Suppressor in Patra et al. |
| VPS17   | YOR132W | Studied as Possible Suppressor in Patra et al. |
| VPS36   | YLR417W | Studied as Possible Suppressor in Patra et al. |
| VPS9    | YML097C | Studied as Possible Suppressor in Patra et al. |
| WHI2    | YOR043W | Studied as Possible Suppressor in Patra et al. |
| YAK1    | YJL141C | Studied as Possible Suppressor in Patra et al. |
| YAL037W | YAL037W | Studied as Possible Suppressor in Patra et al. |
| YAL045C | YAL045C | Studied as Possible Suppressor in Patra et al. |
| YAL064W | YAL064W | Studied as Possible Suppressor in Patra et al. |
| YBL053W | YBL053W | Studied as Possible Suppressor in Patra et al. |
| YBL062W | YBL062W | Studied as Possible Suppressor in Patra et al. |
| YBL077W | YBL077W | Studied as Possible Suppressor in Patra et al. |
| YBL081W | YBL081W | Studied as Possible Suppressor in Patra et al. |
| YBL083C | YBL083C | Studied as Possible Suppressor in Patra et al. |
| YBL107C | YBL107C | Studied as Possible Suppressor in Patra et al. |
| YBR027C | YBR027C | Studied as Possible Suppressor in Patra et al. |
| YBR144C | YBR144C | Studied as Possible Suppressor in Patra et al. |
| YBR226C | YBR226C | Studied as Possible Suppressor in Patra et al. |
| YCL065W | YCL065W | Studied as Possible Suppressor in Patra et al. |
| YDL071C | YDL071C | Studied as Possible Suppressor in Patra et al. |
| YDL157C | YDL157C | Studied as Possible Suppressor in Patra et al. |
| YDL186W | YDL186W | Studied as Possible Suppressor in Patra et al. |
| YDR042C | YDR042C | Studied as Possible Suppressor in Patra et al. |
| YDR078C | YDR078C | Studied as Possible Suppressor in Patra et al. |
| YDR115W | YDR115W | Studied as Possible Suppressor in Patra et al. |
| YDR133C | YDR133C | Studied as Possible Suppressor in Patra et al. |
| YDR134C | YDR134C | Studied as Possible Suppressor in Patra et al. |
| YDR210W | YDR210W | Studied as Possible Suppressor in Patra et al. |
| YDR287W | YDR287W | Studied as Possible Suppressor in Patra et al. |
| YDR333C | YDR333C | Studied as Possible Suppressor in Patra et al. |
| YDR387C | YDR387C | Studied as Possible Suppressor in Patra et al. |

|           |           |                                                |
|-----------|-----------|------------------------------------------------|
| YDR413C   | YDR413C   | Studied as Possible Suppressor in Patra et al. |
| YDR491C   | YDR491C   | Studied as Possible Suppressor in Patra et al. |
| YDR526C   | YDR526C   | Studied as Possible Suppressor in Patra et al. |
| YDR535C   | YDR535C   | Studied as Possible Suppressor in Patra et al. |
| YEL059W   | YEL059W   | Studied as Possible Suppressor in Patra et al. |
| YER010C   | YER010C   | Studied as Possible Suppressor in Patra et al. |
| YER066C-A | YER066C-A | Studied as Possible Suppressor in Patra et al. |
| YER186C   | YER186C   | Studied as Possible Suppressor in Patra et al. |
| YFR020W   | YFR020W   | Studied as Possible Suppressor in Patra et al. |
| YFR043C   | YFR043C   | Studied as Possible Suppressor in Patra et al. |
| YFR056C   | YFR056C   | Studied as Possible Suppressor in Patra et al. |
| YGL128C   | YGL128C   | Studied as Possible Suppressor in Patra et al. |
| YGL146C   | YGL146C   | Studied as Possible Suppressor in Patra et al. |
| YGL182C   | YGL182C   | Studied as Possible Suppressor in Patra et al. |
| YGR017W   | YGR017W   | Studied as Possible Suppressor in Patra et al. |
| YGR035C   | YGR035C   | Studied as Possible Suppressor in Patra et al. |
| YGR064W   | YGR064W   | Studied as Possible Suppressor in Patra et al. |
| YGR115C   | YGR115C   | Studied as Possible Suppressor in Patra et al. |
| YGR237C   | YGR237C   | Studied as Possible Suppressor in Patra et al. |
| YGR277C   | YGR277C   | Studied as Possible Suppressor in Patra et al. |
| YGR280C   | YGR280C   | Studied as Possible Suppressor in Patra et al. |
| YGR287C   | YGR287C   | Studied as Possible Suppressor in Patra et al. |
| YHC1      | YLR298C   | Studied as Possible Suppressor in Patra et al. |
| YHL045W   | YHL045W   | Studied as Possible Suppressor in Patra et al. |
| YHR095W   | YHR095W   | Studied as Possible Suppressor in Patra et al. |
| YIL025C   | YIL025C   | Studied as Possible Suppressor in Patra et al. |
| YIL161W   | YIL161W   | Studied as Possible Suppressor in Patra et al. |
| YIL163C   | YIL163C   | Studied as Possible Suppressor in Patra et al. |
| YIL172C   | YIL172C   | Studied as Possible Suppressor in Patra et al. |
| YJL016W   | YJL016W   | Studied as Possible Suppressor in Patra et al. |
| YJL028W   | YJL028W   | Studied as Possible Suppressor in Patra et al. |
| YJL199C   | YJL199C   | Studied as Possible Suppressor in Patra et al. |
| YJR001W   | YJR001W   | Studied as Possible Suppressor in Patra et al. |
| YJR038C   | YJR038C   | Studied as Possible Suppressor in Patra et al. |
| YJR071W   | YJR071W   | Studied as Possible Suppressor in Patra et al. |
| YKL053W   | YKL053W   | Studied as Possible Suppressor in Patra et al. |
| YKL162C   | YKL162C   | Studied as Possible Suppressor in Patra et al. |
| YKL202W   | YKL202W   | Studied as Possible Suppressor in Patra et al. |
| YKR023W   | YKR023W   | Studied as Possible Suppressor in Patra et al. |
| YKR035C   | YKR035C   | Studied as Possible Suppressor in Patra et al. |
| YKR047W   | YKR047W   | Studied as Possible Suppressor in Patra et al. |
| YLL037W   | YLL037W   | Studied as Possible Suppressor in Patra et al. |
| YLL047W   | YLL047W   | Studied as Possible Suppressor in Patra et al. |
| YLR016C   | YLR016C   | Studied as Possible Suppressor in Patra et al. |
| YLR051C   | YLR051C   | Studied as Possible Suppressor in Patra et al. |



|           |           |                                                |
|-----------|-----------|------------------------------------------------|
| YLR053C   | YLR053C   | Studied as Possible Suppressor in Patra et al. |
| YLR073C   | YLR073C   | Studied as Possible Suppressor in Patra et al. |
| YLR194C   | YLR194C   | Studied as Possible Suppressor in Patra et al. |
| YLR243W   | YLR243W   | Studied as Possible Suppressor in Patra et al. |
| YLR255C   | YLR255C   | Studied as Possible Suppressor in Patra et al. |
| YLR282C   | YLR282C   | Studied as Possible Suppressor in Patra et al. |
| YLR349W   | YLR349W   | Studied as Possible Suppressor in Patra et al. |
| YLR358C   | YLR358C   | Studied as Possible Suppressor in Patra et al. |
| YLR365W   | YLR365W   | Studied as Possible Suppressor in Patra et al. |
| YLR379W   | YLR379W   | Studied as Possible Suppressor in Patra et al. |
| YLR426W   | YLR426W   | Studied as Possible Suppressor in Patra et al. |
| YMR132C   | YMR132C   | Studied as Possible Suppressor in Patra et al. |
| YMR135W-A | YMR135W-A | Studied as Possible Suppressor in Patra et al. |
| YMR153C-A | YMR153C-A | Studied as Possible Suppressor in Patra et al. |
| YMR172C-A | YMR172C-A | Studied as Possible Suppressor in Patra et al. |
| YMR245W   | YMR245W   | Studied as Possible Suppressor in Patra et al. |
| YNL013C   | YNL013C   | Studied as Possible Suppressor in Patra et al. |
| YNL089C   | YNL089C   | Studied as Possible Suppressor in Patra et al. |
| YNL168C   | YNL168C   | Studied as Possible Suppressor in Patra et al. |
| YNL174W   | YNL174W   | Studied as Possible Suppressor in Patra et al. |
| YNL198C   | YNL198C   | Studied as Possible Suppressor in Patra et al. |
| YNL203C   | YNL203C   | Studied as Possible Suppressor in Patra et al. |
| YNL205C   | YNL205C   | Studied as Possible Suppressor in Patra et al. |
| YNL276C   | YNL276C   | Studied as Possible Suppressor in Patra et al. |
| YNL324W   | YNL324W   | Studied as Possible Suppressor in Patra et al. |
| YNR025C   | YNR025C   | Studied as Possible Suppressor in Patra et al. |
| YOL134C   | YOL134C   | Studied as Possible Suppressor in Patra et al. |
| YOL162W   | YOL162W   | Studied as Possible Suppressor in Patra et al. |
| YOR024W   | YOR024W   | Studied as Possible Suppressor in Patra et al. |
| YOR060C   | YOR060C   | Studied as Possible Suppressor in Patra et al. |
| YOR102W   | YOR102W   | Studied as Possible Suppressor in Patra et al. |
| YOR200W   | YOR200W   | Studied as Possible Suppressor in Patra et al. |
| YOR214C   | YOR214C   | Studied as Possible Suppressor in Patra et al. |
| YOR268C   | YOR268C   | Studied as Possible Suppressor in Patra et al. |
| YOR300W   | YOR300W   | Studied as Possible Suppressor in Patra et al. |
| YOR331C   | YOR331C   | Studied as Possible Suppressor in Patra et al. |
| YOR338W   | YOR338W   | Studied as Possible Suppressor in Patra et al. |
| YOR345C   | YOR345C   | Studied as Possible Suppressor in Patra et al. |
| YOR387C   | YOR387C   | Studied as Possible Suppressor in Patra et al. |
| YOR390W   | YOR390W   | Studied as Possible Suppressor in Patra et al. |
| YPL113C   | YPL113C   | Studied as Possible Suppressor in Patra et al. |
| YPL114W   | YPL114W   | Studied as Possible Suppressor in Patra et al. |
| YPL196W   | YPL196W   | Studied as Possible Suppressor in Patra et al. |
| YPL238C   | YPL238C   | Studied as Possible Suppressor in Patra et al. |
| YPL245W   | YPL245W   | Studied as Possible Suppressor in Patra et al. |

|         |         |                                                |
|---------|---------|------------------------------------------------|
| YPL257W | YPL257W | Studied as Possible Suppressor in Patra et al. |
| YPL279C | YPL279C | Studied as Possible Suppressor in Patra et al. |
| YPR014C | YPR014C | Studied as Possible Suppressor in Patra et al. |
| YPR078C | YPR078C | Studied as Possible Suppressor in Patra et al. |
| YPR116W | YPR116W | Studied as Possible Suppressor in Patra et al. |
| YPR150W | YPR150W | Studied as Possible Suppressor in Patra et al. |
| YPS6    | YIR039C | Studied as Possible Suppressor in Patra et al. |
| ZIP2    | YGL249W | Miosis-Specific GO Terms                       |
